# Supplementary material
Source: publisher figshare collection journal article supplement (https://acs.figshare.com/ndownloader/files/4073389)
Supplement: Supplementary file 1 [file 4073389]

Supporting Information for

**Connecting Protein Conformational Dynamics with Catalytic Function  
as Illustrated in Dihydrofolate Reductase**

Yao Fan, Alessandro Cembran, Shuhua Ma,<sup>‡</sup> and Jiali Gao\*

Department of Chemistry, Digital Technology Center, and Supercomputing Institute

University of Minnesota, 207 Pleasant Street SE,

Minneapolis, MN 55455

<sup>‡</sup> Present address: Department of Chemistry, Towson University,

8000 York Road, Towson, MD 21252

Table S1. Computed free energies of activation,  $\Delta G^\ddagger$ , (kcal/mol) from potentials of mean force obtained from classical mechanical (CM) and centroid path integral free energy perturbation and umbrella sampling (PI-FEP/UM) simulations at 5, 25 and 45 °C for the hydride transfer from NADPH to H3F catalyzed by wild-type and M42W/G121V DHFR. Nuclear quantum effects are included in the PI-FEP/UM calculations.

| Temperature | Wild-type DHFR |           | M42W-G121V double mutant |           |
|-------------|----------------|-----------|--------------------------|-----------|
|             | CM             | PI-FEP/UM | CM                       | PI-FEP/UM |
| 5°C         | 15.8           | 12.9      | 16.4                     | 13.7      |
| 25°C        | 16.4           | 13.6      | 17.6                     | 14.8      |
| 45°C        | 16.6           | 13.9      | 17.9                     | 15.5      |
